# Supplementary material for: Compressive Behavior of Carbon Nanotube Reinforced Polypropylene Composites Under High Strain Rate: Insights From Molecular Dynamics
Source: Research Square preprint supplement (doi:10.21203/rs.3.rs-890632/v1), 2021-09-20
Supplement: Supplementary file 1 [file 64b087cef1b4c60a4232c555.docx]

**Graphical Abstract**

Stress-strain curve under compression for (4,4) pristine SWCNT/PP nanocomposites having 0.65 volume fraction.
